# Supplementary material for: Tuning microchannel wettability and fabrication of multiple-step Laplace valves
Source: Royal Society of Chemistry journal article supplement (doi:10.1039/b618851f), 2007-01-01
Supplement: b618851f.pdf [file b618851f.pdf]

# Tuning Microchannel Wettability and Fabrication of Multiple-step Laplace Valves

Go Takei,<sup>a</sup> Mari Nonogi,<sup>a</sup> Akihito Hibara,<sup>abc</sup> Takehiko Kitamori<sup>\*abc</sup> and Haeng-Boo Kim<sup>\*bcd</sup>

<sup>a</sup>Department of Applied Chemistry, School of Engineering, The University of Tokyo, 7-3-1 Hongo, Bunkyo-ku, Tokyo 113-8656, Japan

<sup>b</sup>Micro Chemical Group, Optical Science Laboratory, Kanagawa Academy of Science and Technology (KAST), 3-2-1 Sakado, Takatsu-ku, Kawasaki 213-0012, Japan

<sup>c</sup>Core Research for Evolutional Science and Technology (CREST), Japan Science and Technology Agency, Kawaguchi, Saitama 332-0012, Japan

<sup>d</sup>Engineering Research Institute, School of Engineering, The University of Tokyo, 2-11-6 Yayoi, Bunkyo-ku, Tokyo 113-8656, Japan

E-mail address: hbkim@sogo.t.u-tokyo.ac.jp Fax: +81-3-5841-7728

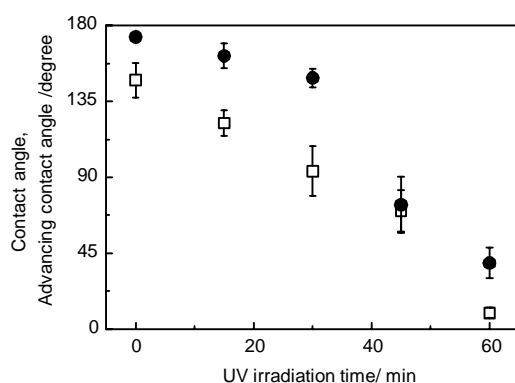

**Fig. S1** Irradiation time dependencies of contact angle (open squares) and advancing contact angle (closed circles) of OTM plate surface.

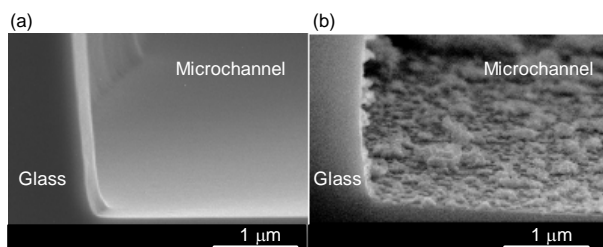

**Fig. S2** SEM images of the microchannel cross sections before (a) and after (b) titania modification.
